# Supplementary material for: Environmental methods for dengue vector control – A systematic review and meta-analysis
Source: PubMed Central journal article supplement (PMC6650086; doi:10.1371/journal.pntd.0007420), 2019-07-11
Supplement: pntd.0007420.s001.pdf [file pntd.0007420.s001.pdf]

## S1 Appendix. Literature search terms for all databases

### PubMed

| Number | Search terms                                   |
|--------|------------------------------------------------|
| 1      | dengue environment vector control              |
| 2      | dengue container                               |
| 3      | dengue waste                                   |
| 4      | dengue clean                                   |
| 5      | dengue source reduction                        |
| 6      | dengue breeding AND (reduction OR elimination) |
| 7      | dengue water storage                           |

### EMBASE

| Number | Search terms                                       |
|--------|----------------------------------------------------|
| 1      | dengue AND environment AND vector AND control      |
| 2      | dengue AND container                               |
| 3      | dengue AND waste                                   |
| 4      | dengue AND clean                                   |
| 5      | dengue AND source AND reduction                    |
| 6      | dengue AND breeding AND (reduction OR elimination) |
| 7      | dengue AND water AND storage                       |

### LILACS

| Number | Search terms                                                                                            |
|--------|---------------------------------------------------------------------------------------------------------|
| 1      | dengue environment vector control                                                                       |
| 2      | dengue container                                                                                        |
| 3      | dengue waste                                                                                            |
| 4      | dengue clean                                                                                            |
| 5      | dengue source reduction                                                                                 |
| 6      | (dengue breeding reduction) OR (dengue breeding elimination) OR (dengue breeding reduction elimination) |
| 7      | dengue water storage                                                                                    |

## WHOLIS

| Number | Search terms           |
|--------|------------------------|
| 1      | dengue AND control     |
| 2      | dengue AND management  |
| 3      | dengue AND environment |

## The Cochrane Library

| Number | Search terms                                                                                            |
|--------|---------------------------------------------------------------------------------------------------------|
| 1      | dengue environment vector control                                                                       |
| 2      | dengue container                                                                                        |
| 3      | dengue waste                                                                                            |
| 4      | dengue clean                                                                                            |
| 5      | dengue source reduction                                                                                 |
| 6      | (dengue breeding reduction) OR (dengue breeding elimination) OR (dengue breeding reduction elimination) |
| 7      | dengue water storage                                                                                    |

## Google Scholar

| Number | Search terms                               |
|--------|--------------------------------------------|
| 1      | dengue environment vector control          |
| 2      | dengue container cover                     |
| 3      | dengue clean-up campaign                   |
| 4      | dengue waste management                    |
| 5      | dengue elimination of breeding sites aedes |
| 6      | Dengue vector source reduction             |
| 7      | dengue water storage practices             |

## PubMed search results

| 1. search term | 2. search term   | 3. search term           | Hits | Records screened |
|----------------|------------------|--------------------------|------|------------------|
| dengue         | environment      | vector control           | 676  | 43               |
| dengue         | container        |                          | 277  | 41               |
| dengue         | waste            |                          | 62   | 16               |
| dengue         | clean            |                          | 36   | 12               |
| dengue         | source reduction |                          | 81   | 17               |
| dengue         | breeding         | Reduction OR elimination | 99   | 16               |
| dengue         | water storage    |                          | 46   | 23               |
