# Supplementary material for: Environmental methods for dengue vector control – A systematic review and meta-analysis
Source: PubMed Central journal article supplement (PMC6650086; doi:10.1371/journal.pntd.0007420), 2019-07-11
Supplement: pntd.0007420.s002.pdf [file pntd.0007420.s002.pdf]

## S2 Appendix. R script

```
library(forestplot)
library(rmeta)
library(Gmisc)
library(xlsx)
library(readxl)

#Container covers without insecticides - Breteau Index

#Generation of matrices including study group, n, BI baseline, BI endline
#and the coefficients and intervals of difference-in-differences and difference-of-endlines.

BICCdifffiffwithout <-
  structure(
    structure(
      c(1, 0, 1, 0, 1, 0, 1, 0, 1, 0, NA,
        NA, NA, 1000, 1000, 1689, 1580, 1000, 1000, 441, 448, NA,
        20, 37.5, 3.4, 2.64, 1.5991, 1.0278, 30.8, 22.2, 81.86, 78.79, NA,
        10.8, 46.9, 12.02, 13.77, 2.4646, 4.3158, 4.3, 21.4, 24.46, 21.49, NA,
        -18.6, NA, -2.51, NA, -2.4225, NA, -25.7, NA, -0.1, NA, -7.8975,
        -18.6, NA, -2.51, NA, -2.4225, NA, -25.7, NA, -0.1, NA, -7.8975,
        -18.6, NA, -2.51, NA, -2.4225, NA, -25.7, NA, -0.1, NA, -7.8975),
      .Dim = c(11L, 7L),
      .Dimnames = list(c("Overgaard", "2016",
        "Basso", "2015",
        "Caprara", "2015",
        "Arunachalam", "2012",
        "Kittayapong", "2012",
        "Pooled"),
        c("group", "n", "BI (b)", "BI (e)", "coef", "lower", "upper")))
  )

BICCdifffendlwithout <-
  structure(
    structure(
      c(1, 0, 1, 0, 1, 0, 1, 0, 1, 0, NA,
        NA, NA, 1000, 1000, 1689, 1580, 1000, 1000, 441, 448, NA,
        20, 37.5, 3.4, 2.64, 1.5991, 1.0278, 30.8, 22.2, 81.86, 78.79, NA,
        10.8, 46.9, 12.02, 13.77, 2.4646, 4.3158, 4.3, 21.4, 24.46, 21.49, NA,
        -36.1, NA, -1.75, NA, -1.85, NA, -17.1, NA, 2.97, NA, -5.0394,
        -36.1, NA, -1.75, NA, -1.85, NA, -17.1, NA, 2.97, NA, -5.0394,
        -36.1, NA, -1.75, NA, -1.85, NA, -17.1, NA, 2.97, NA, -5.0394),
      .Dim = c(11L, 7L),
      .Dimnames = list(c("Overgaard", "2016",
        "Basso", "2015",
        "Caprara", "2015",
        "Arunachalam", "2012",
        "Kittayapong", "2012",
        "Pooled"),
        c("group", "n", "BI (b)", "BI (e)", "coef", "lower", "upper")))
  )

#Introduction of a header for the columns

BICCdifffiffheader <- rbind(rep(NA, times=ncol(BICCdifffiffwithout)),
  BICCdifffiffwithout)
rownames(BICCdifffiffheader)[1] <- "Author"
BICCdifffendlheader <- rbind(rep(NA, times=ncol(BICCdifffendlwithout)),
  BICCdifffendlwithout)
rownames(BICCdifffendlheader)[1] <- "Author"

#Generation of a label matrix including group, n, BI baseline, BI endline,
#difference-in-differences and difference-of-endlines.

lab_mtx_CCBI <- cbind(rownames(BICCdifffiffheader),
  append("group",
    round(BICCdifffiffheader[, "group"], 0) [2:12]),
  append("n",
    round(BICCdifffiffheader[, "n"], 0) [2:12]),
  append("BI (b)",
    round(BICCdifffiffheader[, "BI (b)"], 1) [2:12]),
  append("BI (e)",
    round(BICCdifffiffheader[, "BI (e)"], 1) [2:12]),
  append("DID",
    round(BICCdifffiffheader[, "coef"], 1) [2:12]),
  append("DOE",
```

```

round(BICCdiffendlheader[,"coef"],1)[2:12]))

#Generation of an excel table which was manually processed and red in R again

write.xlsx(lab_mtrx_CCBI, "C:/Users/Claudia/Desktop/R_Plot/lab_mtrx_CCBI.xlsx")
lab_mtrx_CCBI <- read_excel("C:/Users/Claudia/Desktop/R_Plot/lab_mtrx_CCBIv2.xlsx")

#Generation of the forest plot with label matrix

forestplot2(mean=cbind(BICCdiffdiffheader[,"coef"], BICCdiffendlheader[,"coef"]),
  lower=cbind(BICCdiffdiffheader[,"lower"], BICCdiffendlheader[,"lower"]),
  upper=cbind(BICCdiffdiffheader[,"upper"], BICCdiffendlheader[,"upper"]),
  labeltext=lab_mtrx_CCBI,
  txt_gp = fpTxtGp(label = gpar(cex = 0.7),
    legend = gpar(cex = 0.7),
    ticks = gpar(cex = 0.7)),
  is.summary=c(TRUE, rep(FALSE, times=nrow(BICCdiffdiffheader)-1)),
  clip=c(-40, 5),
  xticks=c(-40, -30, -20, -10, 0, 10),
  boxsize=
    c(0.0,
      0.6,
      0,
      0.35,
      0,
      0.44,
      0,
      0.35,
      0,
      0.27,
      0,
      1),
  col=fpColors(box=c("darkred","darkblue")),
  fn.ci_norm=
    list(fpDrawCircleCI,
      fpDrawCircleCI,
      fpDrawNormalCI,
      fpDrawDiamondCI),
  pch=13,
  new_page=TRUE,
  hrzl_lines = list("4" = gpar(lty=2),
    "2" = gpar(col="#444444"),
    "6" = gpar(col="#444444"),
    "8" = gpar(col="#444444"),
    "10" = gpar(col="#444444"),
    "12" = gpar(col="#444444")),
  colgap = unit(5, "mm"),
  lineheight = unit(0.6, "cm"),
  line.margin = unit(0.2, "cm"),
  graphwidth = unit(10, "cm"),
  legend=c("difference-in-differences (DID)","difference-of-endlines (DOE)"),
  legend_args = fpLegend(pos = list(x=0.0, y=-0.2))
)

#Container covers without insecticides - Pupae Per Person Index

#Generation of matrices including study group, n, BI baseline, BI endline
#and the coefficients and intervals of difference-in-differences and difference-of-endlines.

PPICCdiffdiffwithout <-
  structure(
    c(1, 0, 1, 0, 1, 0, 1, 0, 1, 0, 1, 0, NA,
      NA, NA, 2000, 1000, 1689, 1580, 1000, 1000, 441, 448, 592, 600, NA,
      0.0, 0.06, 0.048, 0.016, 0.0229, 0.0104, 1.075, 0.729, 0.44, 0.42, 0.34, 0.33, NA,
      0.04, 0.36, 0.13, 0.14, 0.0292, 0.0539, 0.004, 0.355, 0.04, 0.4, 0.23, 0.15, NA,
      -0.26, NA, -0.042, NA, -0.0372, NA, -0.697, NA, -0.38, NA, 0.07, NA, -0.1831,
      -0.26, NA, -0.042, NA, -0.0372, NA, -0.697, NA, -0.38, NA, 0.07, NA, -0.1831,
      -0.26, NA, -0.042, NA, -0.0372, NA, -0.697, NA, -0.38, NA, 0.07, NA, -0.1831),
    .Dim = c(13L, 7L),
    .Dimnames = list(c("Overgaard", "2016",

```

```

        "Basso", "2015",
        "Caprara", "2015",
        "Arunachalam", "2012",
        "Kittayapong", "2012",
        "Wai", "2012",
        "Pooled"),
    c("group", "n", "PPI (b)", "PPI (e)", "coef", "lower", "upper"))
)

PPICCdiffendlwithout <-
  structure(
    c(1, 0, 1, 0, 1, 0, 1, 0, 1, 0, 1, 0, NA,
      NA, NA, 2000, 1000, 1689, 1580, 1000, 1000, 441, 448, 592, 600, NA,
      0.0, 0.06, 0.048, 0.016, 0.0229, 0.0104, 1.075, 0.729, 0.44, 0.42, 0.34, 0.33, NA,
      0.04, 0.36, 0.13, 0.14, 0.0292, 0.0539, 0.004, 0.355, 0.04, 0.4, 0.23, 0.15, NA,
      -0.32, NA, -0.01, NA, -0.02, NA, -0.35, NA, -0.36, NA, 0.08, NA, -0.1000,
      -0.32, NA, -0.01, NA, -0.02, NA, -0.35, NA, -0.36, NA, 0.08, NA, -0.1000,
      -0.32, NA, -0.01, NA, -0.02, NA, -0.35, NA, -0.36, NA, 0.08, NA, -0.1000),
    .Dim = c(13L, 7L),
    .Dimnames = list(c("Overgaard", "2016",
      "Basso", "2015",
      "Caprara", "2015",
      "Arunachalam", "2012",
      "Kittayapong", "2012",
      "Wai", "2012",
      "Pooled"),
    c("group", "n", "PPI (b)", "PPI (e)", "coef", "lower", "upper"))
  )

#Introduction of a header for the columns

PPICCdiffdiffheader <- rbind(rep(NA, times=ncol(PPICCdiffdiffwithout)),
  PPICCdiffdiffwithout)
PPICCdiffendlheader <- rbind(rep(NA, times=ncol(PPICCdiffendlwithout)),
  PPICCdiffendlwithout)
rownames(PPICCdiffdiffheader)[1] <- "Author"
rownames(PPICCdiffendlheader)[1] <- "Author"

#Generation of a label matrix including group, n, BI baseline, BI endline,
#difference-in-differences and difference-of-endlines.

lab_mtrx_CCPPI <- cbind(rownames(PPICCdiffdiffheader),
  append("group",
    round(PPICCdiffdiffheader[, "group"], 0) [2:14]),
  append("n",
    round(PPICCdiffdiffheader[, "n"], 0) [2:14]),
  append("PPI (b)",
    round(PPICCdiffdiffheader[, "PPI (b)"], 2) [2:14]),
  append("PPI (e)",
    round(PPICCdiffdiffheader[, "PPI (e)"], 2) [2:14]),
  append("DID",
    round(PPICCdiffdiffheader[, "coef"], 2) [2:14]),
  append("DOE",
    round(PPICCdiffendlheader[, "coef"], 2) [2:14]))

#Generation of an excel table which was manually processed and red in R again

write.xlsx(lab_mtrx_CCPPI, "C:/Users/Claudia/Desktop/R_Plot/lab_mtrx_CCPPI.xlsx")
lab_mtrx_CCPPI <- read_excel("C:/Users/Claudia/Desktop/R_Plot/lab_mtrx_CCPPIv2.xlsx")

#Generation of the forest plot with label matrix

forestplot2(mean=cbind(PPICCdiffdiffheader[, "coef"], PPICCdiffendlheader[, "coef"]),
  lower=cbind(PPICCdiffdiffheader[, "lower"], PPICCdiffendlheader[, "lower"]),
  upper=cbind(PPICCdiffdiffheader[, "upper"], PPICCdiffendlheader[, "upper"]),
  labeltext=lab_mtrx_CCPPI,
  txt_gp = fpTxtGp(label = gpar(cex = 0.7),
    legend = gpar(cex = 0.7),
    ticks = gpar(cex = 0.7)),
  is.summary=c(TRUE, rep(FALSE, times=nrow(PPICCdiffdiffheader)-1)),
  clip=c(-1, 0.5),
  xticks=c(-1, -0.5, 0, 0.5),
  boxsize=
    c(0.0,
      0.6,
      0,
      0.37,
      0,

```

```

0.39,
0,
0.32,
0,
0.25,
0,
0.27,
0,
1),
col=fpColors(box=c("darkred", "darkblue")),
fn.ci_norm=
  list(fpDrawCircleCI,
        fpDrawCircleCI,
        fpDrawNormalCI,
        fpDrawDiamondCI),
pch=13,
new_page=TRUE,
hrzl_lines = list("4" = gpar(lty=2),
                  "2" = gpar(col="#444444"),
                  "6" = gpar(col="#444444"),
                  "8" = gpar(col="#444444"),
                  "10" = gpar(col="#444444"),
                  "12" = gpar(col="#444444"),
                  "14" = gpar(col="#444444")),
colgap = unit(5, "mm"),
lineheight = unit(0.6, "cm"),
line.margin = unit(0.2, "cm"),
graphwidth = unit(10, "cm"),
legend=c("difference-in-differences (DID)", "difference-of-endlines (DOE)"),
legend_args = fpLegend(pos = list(x=0.0, y=-0.2))
)

```

**#Container covers with insecticides - Breteau Index**

**#Generation of matrices including study group, n, BI baseline, BI endline  
#and the coefficients and intervals of difference-in-differences and difference-of-endlines.**

```

BICCDiffDiffWith <-
  structure(
    c(1, 0, 1, 0, 1, 0, 1, 0, NA,
      549, 549, 327, 282, 720, 720, 558, 558, NA,
      60, 113, 8.9, 5, 11.2, 6.6, 38, 34, NA,
      7, 12, 4.5, 3.2, 14.1, 8.6, 11, 17, NA,
      48, NA, -2.6, NA, 0.9, NA, -10, NA, -3.616872038,
      48, NA, -2.6, NA, 0.9, NA, -10, NA, -3.616872038,
      48, NA, -2.6, NA, 0.9, NA, -10, NA, -3.616872038),
    .Dim = c(9L, 7L),
    .Dimnames = list(c("Kroeger (Mexico)", "2006",
                      "Quintero", "2015",
                      "Tun-Lin (Venezuela)", "2009",
                      "Kroeger (Venezuela)", "2006",
                      "Pooled"),
                    c("group", "n", "BI (b)", "BI (e)", "coef", "lower", "upper")))
)

```

```

BICCDiffEndlWith <-
  structure(
    c(1, 0, 1, 0, 1, 0, 1, 0, NA,
      549, 549, 327, 282, 720, 720, 558, 558, NA,
      60, 113, 8.9, 5, 11.2, 6.6, 38, 34, NA,
      7, 12, 4.5, 3.2, 14.1, 8.6, 11, 17, NA,
      -5, NA, 1.3, NA, 5.5, NA, -6, NA, 0.63687204,
      -5, NA, 1.3, NA, 5.5, NA, -6, NA, 0.63687204,
      -5, NA, 1.3, NA, 5.5, NA, -6, NA, 0.63687204),
    .Dim = c(9L, 7L),
    .Dimnames = list(c("Kroeger (Mexico)", "2006",
                      "Quintero", "2015",
                      "Tun-Lin (Venezuela)", "2009",

```



```

colgap = unit(5, "mm"),
lineheight = unit(0.6, "cm"),
line.margin = unit(0.2, "cm"),
graphwidth = unit(10, "cm"),
legend=c("difference-in-differences (DID)", "difference-of-endlines (DOE)"),
legend_args = fpLegend(pos = list(x=0.0, y=-0.25))
)

#Container covers with insecticides - Pupae Per Person Index

#Generation of matrices including study group, n, BI baseline, BI endline
#and the coefficients and intervals of difference-in-differences and difference-of-endlines.

PPICCdiffdiffwith <-
  structure(
    c(1, 0, 1, 0, 1, 0, 1, 0, NA,
      327, 282, 720, 720, 549, 549, 558, 558, NA,
      1.25, 0.24, 0.61, 0.23, 3.4, 2, 2.7, 1.6, NA,
      0.23, 0.32, 0.57, 0.2, 0.36, 0.35, 0.2, 0.3, NA,
      -1.1, NA, -0.01, NA, -1.39, NA, -1.2, NA, -0.833,
      -1.1, NA, -0.01, NA, -1.39, NA, -1.2, NA, -0.833,
      -1.1, NA, -0.01, NA, -1.39, NA, -1.2, NA, -0.833),
    .Dim = c(9L, 7L),
    .Dimnames = list(c("Quintero", "2015",
                      "Tun-Lin (Venezuela)", "2009",
                      "Kroeger (Mexico)", "2006",
                      "Kroeger (Venezuela)", "2006",
                      "Pooled"),
                    c("group", "n", "PPI (b)", "PPI (e)", "coef", "lower", "upper")))
  )

PPICCdiffendlwith <-
  structure(
    c(1, 0, 1, 0, 1, 0, 1, 0, NA,
      327, 282, 720, 720, 549, 549, 558, 558, NA,
      1.25, 0.24, 0.61, 0.23, 3.4, 2, 2.7, 1.6, NA,
      0.23, 0.32, 0.57, 0.2, 0.36, 0.35, 0.2, 0.3, NA,
      -0.09, NA, 0.37, NA, 0.01, NA, -0.1, NA, 0.086,
      -0.09, NA, 0.37, NA, 0.01, NA, -0.1, NA, 0.086,
      -0.09, NA, 0.37, NA, 0.01, NA, -0.1, NA, 0.086),
    .Dim = c(9L, 7L),
    .Dimnames = list(c("Quintero", "2015",
                      "Tun-Lin (Venezuela)", "2009",
                      "Kroeger (Mexico)", "2006",
                      "Kroeger (Venezuela)", "2006",
                      "Pooled"),
                    c("group", "n", "PPI (b)", "PPI (e)", "coef", "lower", "upper")))
  )

#Introduction of a header for the columns

PPICCdiffdiffwithheader <- rbind(rep(NA, times=ncol(PPICCdiffdiffwith)),
                                PPICCdiffdiffwith)
rownames(PPICCdiffdiffwithheader)[1] <- "Author"
PPICCdiffendlwithheader <- rbind(rep(NA, times=ncol(PPICCdiffendlwith)),
                                PPICCdiffendlwith)
rownames(PPICCdiffendlwithheader)[1] <- "Author"

#Generation of a label matrix including group, n, BI baseline, BI endline,
#difference-in-differences and difference-of-endlines.

lab_mtrx_CCPPIwith <- cbind(rownames(PPICCdiffdiffwithheader),
                            append("group",
                                    round(PPICCdiffdiffwithheader[, "group"], 0) [2:10]),
                            append("n",
                                    round(PPICCdiffdiffwithheader[, "n"], 0) [2:10]),
                            append("PPI (b)",
                                    round(PPICCdiffdiffwithheader[, "PPI (b)"], 2) [2:10]),
                            append("PPI (e)",
                                    round(PPICCdiffdiffwithheader[, "PPI (e)"], 2) [2:10]),
                            append("DID",
                                    round(PPICCdiffdiffwithheader[, "coef"], 2) [2:10]),
                            append("DOE",
                                    round(PPICCdiffendlwithheader[, "coef"], 2) [2:10]))

#Generation of an excel table which was manually processed and red in R again

write.xlsx(lab_mtrx_CCPPIwith, "C:/Users/Claudia/Desktop/R_Plot/lab_mtrx_CCPPIwith.xlsx")

```

```
lab_mtrx_CCPPIwith <- read_excel("C:/Users/Claudia/Desktop/R_Plot/lab_mtrx_CCPPIwithv2.xlsx")
```

**#Generation of the forest plot with label matrix**

```
forestplot2(mean=cbind(PPICCdifffdiffwithheader[, "coef"], PPICCdifffendlwithheader[, "coef"]),
  lower=cbind(PPICCdifffdiffwithheader[, "lower"], PPICCdifffendlwithheader[, "lower"]),
  upper=cbind(PPICCdifffdiffwithheader[, "upper"], PPICCdifffendlwithheader[, "upper"]),
  labeltext=lab_mtrx_CCPPIwith,
  txt_gp = fpTxtGp(label = gpar(cex = 0.7),
    legend = gpar(cex = 0.7),
    ticks = gpar(cex = 0.7)),
  is.summary=c(TRUE, rep(FALSE, times=nrow(PPICCdifffdiffwithheader)-1)),
  clip=c(-2, 0.5),
  xticks=c(-2, -1.5, -1, -0.5, 0, 0.5),
  boxsize=
    c(0.0,
      0.29,
      0,
      0.40,
      0,
      0.35,
      0,
      0.36,
      0,
      1),
  col=fpColors(box=c("darkred", "darkblue")),
  fn.ci_norm=
    list(fpDrawNormalCI,
      fpDrawNormalCI,
      fpDrawNormalCI,
      fpDrawNormalCI,
      fpDrawNormalCI,
      fpDrawNormalCI,
      fpDrawNormalCI,
      fpDrawNormalCI,
      fpDrawNormalCI,
      fpDrawNormalCI,
      fpDrawDiamondCI),
  pch=13,
  new_page=TRUE,
  hrzl_lines = list("2" = gpar(col="#444444"),
    "4" = gpar(col="#444444"),
    "6" = gpar(col="#444444"),
    "8" = gpar(col="#444444"),
    "10" = gpar(col="#444444")),
  colgap = unit(5, "mm"),
  lineheight = unit(0.6, "cm"),
  line.margin = unit(0.2, "cm"),
  graphwidth = unit(10, "cm"),
  legend=c("difference-in-differences (DID)", "difference-of-endlines (DOE)"),
  legend_args = fpLegend(pos = list(x=0.0, y=-0.25))
)
```

**#Waste management without direct garbage collection - Breteau Index**

**#Generation of matrices including study group, n, BI baseline, BI endline**

**#and the coefficients and intervals of difference-in-differences and difference-of-endlines.**

```
BIWmdifffdiffwithout <-
  structure(
    c(1, 0, 1, 0, 1, 0, 1, 0, NA,
      9529, 9309, 200, 200, 8422, 10748, 225, 225, NA,
      NA, NA, 6.9, 2, 0.27, 0.2, 41.5, 35, NA,
      19.7, 30.2, 0.5, 3.5, 0.28, 0.52, 34, 46, NA,
      NA, NA, -7.9, NA, -0.31, NA, -18.5, NA, -0.448,
      NA, NA, -7.9, NA, -0.31, NA, -18.5, NA, -0.448,
      NA, NA, -7.9, NA, -0.31, NA, -18.5, NA, -0.448),
    .Dim = c(9L, 7L),
    .Dimnames = list(c("Andersson", "2015",
      "Tana", "2012",
      "Vanlerberghe", "2009",
      "Leontsini", "1993",
      "Pooled"),
      c("group", "n", "BI (b)", "BI (e)", "coef", "lower", "upper"))
  )
```

```
BIWmdifffendlwithout <-
  structure(
    c(1, 0, 1, 0, 1, 0, 1, 0, NA,
```





```

        fpDrawNormalCI,
        fpDrawNormalCI,
        fpDrawDiamondCI),
pch=13,
new_page=TRUE,
hrzl_lines = list("2" = gpar(col="#444444"),
                  "4" = gpar(col="#444444"),
                  "6" = gpar(col="#444444"),
                  "8" = gpar(col="#444444"),
                  "10" = gpar(col="#444444")),
colgap = unit(5, "mm"),
lineheight = unit(0.6, "cm"),
line.margin = unit(0.2, "cm"),
graphwidth = unit(10, "cm"),
legend=c("difference-in-differences (DID)", "difference-of-endlines (DOE)"),
legend_args = fpLegend(pos = list(x=0.0, y=-0.25))
)

#Waste management without direct garbage collection - Pupae Per Person Index

#Generation of matrices including study group, n, BI baseline, BI endline
#and the coefficients and intervals of difference-in-differences and difference-of-endlines.

PPIWMdiffdiffwithout <-
  structure(
    c(1, 0, 1, 0, 1, 0, 1, 0, NA,
      9529, 9309, 1000, 1000, 200, 200, 8422, 10748, NA,
      NA, NA, 0.524, 0.817, 0.015, 0.05, 0.44, 0.29, NA,
      0.092, 0.175, 0.08, 0.353, 0.005, 0.04, 0.36, 1.4, NA,
      NA, NA, 0.02, NA, 0, NA, -1.19, NA, -0.564,
      NA, NA, 0.02, NA, 0, NA, -1.19, NA, -0.564,
      NA, NA, 0.02, NA, 0, NA, -1.19, NA, -0.564),
    .Dim = c(9L, 7L),
    .Dimnames = list(c("Andersson", "2015",
                      "Mitchell-Foster", "2015",
                      "Tana", "2012",
                      "Vanlerberghe", "2009",
                      "Pooled"),
                    c("group", "n", "PPI (b)", "PPI (e)", "coef", "lower", "upper")))
)

PPIWMdiffendlwithout <-
  structure(
    c(1, 0, 1, 0, 1, 0, 1, 0, NA,
      9529, 9309, 1000, 1000, 200, 200, 8422, 10748, NA,
      NA, NA, 0.524, 0.817, 0.015, 0.05, 0.44, 0.29, NA,
      0.092, 0.175, 0.08, 0.353, 0.005, 0.04, 0.36, 1.4, NA,
      -0.083, NA, -0.273, NA, -0.035, NA, -1.04, NA, -0.546,
      -0.083, NA, -0.273, NA, -0.035, NA, -1.04, NA, -0.546,
      -0.083, NA, -0.273, NA, -0.035, NA, -1.04, NA, -0.546),
    .Dim = c(9L, 7L),
    .Dimnames = list(c("Andersson", "2015",
                      "Mitchell-Foster", "2015",
                      "Tana", "2012",
                      "Vanlerberghe", "2009",
                      "Pooled"),
                    c("group", "n", "PPI (b)", "PPI (e)", "coef", "lower", "upper")))
)

#Introduction of a header for the columns

PPIWMdiffdiffheader <- rbind(rep(NA, times=ncol(PPIWMdiffdiffwithout)),
                             PPIWMdiffdiffwithout)
rownames(PPIWMdiffdiffheader)[1] <- "Author"
PPIWMdiffendlheader <- rbind(rep(NA, times=ncol(PPIWMdiffendlwithout)),
                             PPIWMdiffendlwithout)
rownames(PPIWMdiffendlheader)[1] <- "Author"

#Generation of a label matrix including group, n, BI baseline, BI endline,
#difference-in-differences and difference-of-endlines.

lab_mtrx_WMPPI <- cbind(rownames(PPIWMdiffdiffheader),
                        append("group",
                              round(PPIWMdiffdiffheader[, "group"], 0)[2:10]),
                        append("n",
                              round(PPIWMdiffdiffheader[, "n"], 0)[2:10]),
                        append("PPI (b)",
                              round(PPIWMdiffdiffheader[, "PPI (b)"], 2)[2:10]),

```

```

        append("PPI (e)",
              round(PPIWMDiffdiffheader[,"PPI (e)"],2)[2:10]),
        append("DID",
              round(PPIWMDiffdiffheader[,"coef"],2)[2:10]),
        append("DOE",
              round(PPIWMDiffendheader[,"coef"],2)[2:10]))

#Generation of an excel table which was manually processed and red in R again

write.xlsx(lab_mtrx_WMPPI, "C:/Users/Claudia/Desktop/R_Plot/lab_mtrx_WMPPI.xlsx")
lab_mtrx_WMPPI <- read_excel("C:/Users/Claudia/Desktop/R_Plot/lab_mtrx_WMPPIv2.xlsx")

#Generation of the forest plot with label matrix

forestplot2(mean=cbind(PPIWMDiffdiffheader[,"coef"], PPIWMDiffendheader[,"coef"]),
            lower=cbind(PPIWMDiffdiffheader[,"lower"], PPIWMDiffendheader[,"lower"]),
            upper=cbind(PPIWMDiffdiffheader[,"upper"], PPIWMDiffendheader[,"upper"]),
            labeltext=lab_mtrx_WMPPI,
            txt_gp = fpTxtGp(label = gpar(cex = 0.7),
                              legend = gpar(cex = 0.7),
                              ticks = gpar(cex = 0.7)),
            is.summary=c(TRUE, rep(FALSE, times=nrow(PPIWMDiffdiffheader)-1)),
            clip=c(-1.5, 0.5),
            xticks=c(-1.5, -1, -0.5, 0, 0.5),
            boxsize=
              c(0.0,
                0.48,
                0,
                0.23,
                0,
                0.21,
                0,
                0.48,
                0,
                1),
            col=fpColors(box=c("darkred","darkblue")),
            fn.ci_norm=
              list(fpDrawNormalCI,
                  fpDrawNormalCI,
                  fpDrawDiamondCI),
            pch=13,
            new_page=TRUE,
            hrzl_lines = list("2" = gpar(col="#444444"),
                              "4" = gpar(col="#444444"),
                              "6" = gpar(col="#444444"),
                              "8" = gpar(col="#444444"),
                              "10" = gpar(col="#444444")),
            colgap = unit(5, "mm"),
            lineheight = unit(0.6, "cm"),
            line.margin = unit(0.2, "cm"),
            graphwidth = unit(10, "cm"),
            legend=c("difference-in-differences (DID)","difference-of-endlines (DOE)"),
            legend_args = fpLegend(pos = list(x=0.0, y=-0.25))
)

#Waste management with direct garbage collection - Breteau Index

#Generation of matrices including study group, n, BI baseline, BI endline
#and the coefficients and intervals of difference-in-differences and difference-of-endlines.

BIWMDiffdiffwith <-
  structure(
    c(1, 0, 1, 0, 1, 0, 1, 0, 1, 0, 1, 0, NA,
      NA, NA, 1689, 1580, 803, 790, 1000, 1000, 389, 390, 441, 448, NA,
      20, 37.5, 1.5991, 1.0278, 11.75, 9.75, 30.8, 22.2, 8, 11, 81.86, 78.79, NA,
      10.8, 46.9, 2.4646, 4.3158, 3.13, 6.25, 4.3, 21.4, 11, 24, 24.46, 21.49, NA,
      -18.6, NA, -2.4225, NA, -5.12, NA, -25.7, NA, -10, NA, -0.1, NA, -8.834,
      -18.6, NA, -2.4225, NA, -5.12, NA, -25.7, NA, -10, NA, -0.1, NA, -8.834,
      -18.6, NA, -2.4225, NA, -5.12, NA, -25.7, NA, -10, NA, -0.1, NA, -8.834),
    .Dim = c(13L, 7L),
    .Dimnames = list(c("Overgaard", "2016",

```

```

        "Caprara", "2015",
        "Abeyewickreme", "2012",
        "Arunachalam", "2012",
        "Castro", "2012",
        "Kittayapong", "2012",
        "Pooled"),
    c("group", "n", "BI (b)", "BI (e)", "coef", "lower", "upper"))
)

BIWMdiffendlwith <-
  structure(
    c(1, 0, 1, 0, 1, 0, 1, 0, 1, 0, 1, 0, NA,
      NA, NA, 1689, 1580, 803, 790, 1000, 1000, 389, 390, 441, 448, NA,
      20, 37.5, 1.5991, 1.0278, 11.75, 9.75, 30.8, 22.2, 8, 11, 81.86, 78.79, NA,
      10.8, 46.9, 2.4646, 4.3158, 3.13, 6.25, 4.3, 21.4, 11, 24, 24.46, 21.49, NA,
      -36.1, NA, -1.8512, NA, -3.12, NA, -17.1, NA, -13, NA, 2.97, NA, -6.179,
      -36.1, NA, -1.8512, NA, -3.12, NA, -17.1, NA, -13, NA, 2.97, NA, -6.179,
      -36.1, NA, -1.8512, NA, -3.12, NA, -17.1, NA, -13, NA, 2.97, NA, -6.179),
    .Dim = c(13L, 7L),
    .Dimnames = list(c("Overgaard", "2016",
      "Caprara", "2015",
      "Abeyewickreme", "2012",
      "Arunachalam", "2012",
      "Castro", "2012",
      "Kittayapong", "2012",
      "Pooled"),
    c("group", "n", "BI (b)", "BI (e)", "coef", "lower", "upper"))
)

#Introduction of a header for the columns

BIWMdiffdiffwithheader <- rbind(rep(NA, times=ncol(BIWMdiffdiffwith)),
  BIWMdiffdiffwith)
rownames(BIWMdiffdiffwithheader)[1] <- "Author"
BIWMdiffendlwithheader <- rbind(rep(NA, times=ncol(BIWMdiffendlwith)),
  BIWMdiffendlwith)
rownames(BIWMdiffendlwithheader)[1] <- "Author"

#Generation of a label matrix including group, n, BI baseline, BI endline,
#difference-in-differences and difference-of-endlines.

lab_mtx_WMBIWith <- cbind(rownames(BIWMdiffdiffwithheader),
  append("group",
    round(BIWMdiffdiffwithheader[, "group"], 0) [2:14]),
  append("n",
    round(BIWMdiffdiffwithheader[, "n"], 0) [2:14]),
  append("BI (b)",
    round(BIWMdiffdiffwithheader[, "BI (b)"], 1) [2:14]),
  append("BI (e)",
    round(BIWMdiffdiffwithheader[, "BI (e)"], 1) [2:14]),
  append("DID",
    round(BIWMdiffdiffwithheader[, "coef"], 1) [2:14]),
  append("DOE",
    round(BIWMdiffendlwithheader[, "coef"], 1) [2:14]))

#Generation of an excel table which was manually processed and red in R again

write.xlsx(lab_mtx_WMBIWith, "C:/Users/Claudia/Desktop/R_Plot/lab_mtx_WMBIWith.xlsx")
lab_mtx_WMBIWith <- read_excel("C:/Users/Claudia/Desktop/R_Plot/lab_mtx_WMBIWithv2.xlsx")

#Generation of the forest plot with label matrix

forestplot2(mean=cbind(BIWMdiffdiffwithheader[, "coef"], BIWMdiffendlwithheader[, "coef"]),
  lower=cbind(BIWMdiffdiffwithheader[, "lower"], BIWMdiffendlwithheader[, "lower"]),
  upper=cbind(BIWMdiffdiffwithheader[, "upper"], BIWMdiffendlwithheader[, "upper"]),
  labeltext=lab_mtx_WMBIWith,
  txt_gp = fpTxtGp(label = gpar(cex = 0.7),
    legend = gpar(cex = 0.7),
    ticks = gpar(cex = 0.7)),
  is.summary=c(TRUE, rep(FALSE, times=nrow(BIWMdiffdiffwithheader)-1)),
  clip=c(-40, 10),
  xticks=c(-40, -30, -20, -10, 0, 10),
  boxsize=
    c(0.0,
      0.6,
      0,
      0.43,
      0,

```

```

0.31,
0,
0.34,
0,
0.25,
0,
0.26,
0,
1),
col=fpColors(box=c("darkred","darkblue")),
fn.ci_norm=
  list(fpDrawCircleCI,
        fpDrawCircleCI,
        fpDrawNormalCI,
        fpDrawDiamondCI),
pch=13,
new_page=TRUE,
hrzl_lines = list("2" = gpar(col="#444444"),
                  "4" = gpar(lty=2),
                  "6" = gpar(col="#444444"),
                  "8" = gpar(col="#444444"),
                  "10" = gpar(col="#444444"),
                  "12" = gpar(col="#444444"),
                  "14" = gpar(col="#444444")),
colgap = unit(5, "mm"),
lineheight = unit(0.6, "cm"),
line.margin = unit(0.2, "cm"),
graphwidth = unit(10, "cm"),
legend=c("difference-in-differences (DID)","difference-of-endlines (DOE)"),
legend_args = fpLegend(pos = list(x=0.0, y=-0.2))
)

```

**#Waste management with direct garbage collection - Pupae Per Person Index**

**#Generation of matrices including study group, n, BI baseline, BI endline  
#and the coefficients and intervals of difference-in-differences and difference-of-endlines.**

```

PPIWMDiffdiffwith <-
structure(
  c(1, 0, 1, 0, 1, 0, 1, 0, 1, 0, NA,
    NA, NA, 1689, 1580, 1000, 1000, 441, 448, 592, 600, NA,
    0, 0.06, 0.0229, 0.0104, 1.075, 0.729, 0.44, 0.42, 0.34, 0.33, NA,
    0.04, 0.36, 0.0292, 0.0539, 0.004, 0.355, 0.04, 0.4, 0.23, 0.15, NA,
    -0.26, NA, -0.0372, NA, -0.697, NA, -0.38, NA, 0.07, NA, -0.2408,
    -0.26, NA, -0.0372, NA, -0.697, NA, -0.38, NA, 0.07, NA, -0.2408,
    -0.26, NA, -0.0372, NA, -0.697, NA, -0.38, NA, 0.07, NA, -0.2408),
  .Dim = c(11L, 7L),
  .Dimnames = list(c("Overgaard", "2016",
                    "Caprara", "2015",
                    "Arunachalam", "2012",
                    "Kittayapong", "2012",
                    "Wai", "2012",
                    "Pooled"),
                  c("group", "n", "PPI (b)", "PPI (e)", "coef", "lower", "upper")))
)

```

```

PPIWMDiffendlwith <-
structure(
  c(1, 0, 1, 0, 1, 0, 1, 0, 1, 0, NA,
    NA, NA, 1689, 1580, 1000, 1000, 441, 448, 592, 600, NA,
    0, 0.06, 0.0229, 0.0104, 1.075, 0.729, 0.44, 0.42, 0.34, 0.33, NA,
    0.04, 0.36, 0.0292, 0.0539, 0.004, 0.355, 0.04, 0.4, 0.23, 0.15, NA,
    -0.32, NA, -0.0247, NA, -0.351, NA, -0.36, NA, 0.08, NA, -0.1371,
    -0.32, NA, -0.0247, NA, -0.351, NA, -0.36, NA, 0.08, NA, -0.1371,
    -0.32, NA, -0.0247, NA, -0.351, NA, -0.36, NA, 0.08, NA, -0.1371),
  .Dim = c(11L, 7L),
  .Dimnames = list(c("Overgaard", "2016",
                    "Caprara", "2015"),

```



```

new_page=TRUE,
hrzl_lines = list("2" = gpar(col="#444444"),
                  "4" = gpar(lty=2),
                  "6" = gpar(col="#444444"),
                  "8" = gpar(col="#444444"),
                  "10" = gpar(col="#444444"),
                  "12" = gpar(col="#444444")),
colgap = unit(5, "mm"),
lineheight = unit(0.6, "cm"),
line.margin = unit(0.2, "cm"),
graphwidth = unit(10, "cm"),
legend=c("difference-in-differences (DID)", "difference-of-endlines (DOE)"),
legend_args = fpLegend(pos = list(x=0.0, y=-0.2))
)

#Elimination of breeding places - Breteau Index

#Generation of matrices including study group, n, BI baseline, BI endline
#and the coefficients and intervals of difference-in-differences and difference-of-endlines.

BIELdiffdiffwithout <-
  structure(
    c(1, 0, 1, 0, 1, 0, 1, 0, NA,
      1000, 1000, 441, 448, 500, 500, 8422, 10748, NA,
      3.4, 2.64, 81.86, 78.79, 17.1, 10.9, 0.27, 0.2, NA,
      12.02, 13.77, 24.46, 21.49, 17.8, 12.7, 0.28, 0.52, NA,
      -2.51, NA, -0.1, NA, -1.1, NA, -0.31, NA, -0.527,
      -2.51, NA, -0.1, NA, -1.1, NA, -0.31, NA, -0.527,
      -2.51, NA, -0.1, NA, -1.1, NA, -0.31, NA, -0.527),
    .Dim = c(9L, 7L),
    .Dimnames = list(c("Basso", "2015",
                      "Kittayapong", "2012",
                      "Tun-Lin (Peru)", "2009",
                      "Vanlerberghe", "2009",
                      "Pooled"),
                    c("group", "n", "BI (b)", "BI (e)", "coef", "lower", "upper")))
)

BIELdiffendlwithout <-
  structure(
    c(1, 0, 1, 0, 1, 0, 1, 0, NA,
      1000, 1000, 441, 448, 500, 500, 8422, 10748, NA,
      3.4, 2.64, 81.86, 78.79, 17.1, 10.9, 0.27, 0.2, NA,
      12.02, 13.77, 24.46, 21.49, 17.8, 12.7, 0.28, 0.52, NA,
      -1.75, NA, 2.97, NA, 5.1, NA, -0.24, NA, -0.015,
      -1.75, NA, 2.97, NA, 5.1, NA, -0.24, NA, -0.015,
      -1.75, NA, 2.97, NA, 5.1, NA, -0.24, NA, -0.015),
    .Dim = c(9L, 7L),
    .Dimnames = list(c("Basso", "2015",
                      "Kittayapong", "2012",
                      "Tun-Lin (Peru)", "2009",
                      "Vanlerberghe", "2009",
                      "Pooled"),
                    c("group", "n", "BI (b)", "BI (e)", "coef", "lower", "upper")))
)

#Introduction of a header for the columns

BIELdiffdiffheader <- rbind(rep(NA, times=ncol(BIELdiffdiffwithout)),
                             BIELdiffdiffwithout)
rownames(BIELdiffdiffheader)[1] <- "Author"
BIELdiffendlheader <- rbind(rep(NA, times=ncol(BIELdiffendlwithout)),
                             BIELdiffendlwithout)
rownames(BIELdiffendlheader)[1] <- "Author"

#Generation of a label matrix including group, n, BI baseline, BI endline,
#difference-in-differences and difference-of-endlines.

lab_mtx_ELBI <- cbind(rownames(BIELdiffdiffheader),
                      append("group",
                              round(BIELdiffdiffheader[, "group"], 0) [2:10]),
                      append("n",
                              round(BIELdiffdiffheader[, "n"], 0) [2:10]),
                      append("BI (b)",
                              round(BIELdiffdiffheader[, "BI (b)"], 1) [2:10]),
                      append("BI (e)",
                              round(BIELdiffdiffheader[, "BI (e)"], 1) [2:10]),
                      append("DID",

```

```

        round(BIELdiffdiffheader[,"coef"],1)[2:10]),
append("DOE",
        round(BIELdiffendlheader[,"coef"],1)[2:10]))

#Generation of an excel table which was manually processed and red in R again

write.xlsx(lab_mtrx_ELBI, "C:/Users/Claudia/Desktop/R_Plot/lab_mtrx_ELBI.xlsx")
lab_mtrx_ELBI <- read_excel("C:/Users/Claudia/Desktop/R_Plot/lab_mtrx_ELBIv2.xlsx")

#Generation of the forest plot with label matrix

forestplot2(mean=cbind(BIELdiffdiffheader[,"coef"], BIELdiffendlheader[,"coef"]),
lower=cbind(BIELdiffdiffheader[,"lower"], BIELdiffendlheader[,"lower"]),
upper=cbind(BIELdiffdiffheader[,"upper"], BIELdiffendlheader[,"upper"]),
labeltext=lab_mtrx_ELBI,
txt_gp = fpTxtGp(label = gpar(cex = 0.7),
legend = gpar(cex = 0.7),
ticks = gpar(cex = 0.7)),
is.summary=c(TRUE, rep(FALSE, times=nrow(BIELdiffdiffheader)-1)),
clip=c(-5, 7),
xticks=c(-5, -3, -1, 1, 3, 5, 7),
boxsize=
c(0.0,
0.25,
0,
0.22,
0,
0.23,
0,
0.70,
0,
1),
col=fpColors(box=c("darkred","darkblue")),
fn.ci_norm=
list(fpDrawNormalCI,
fpDrawNormalCI,
fpDrawDiamondCI),
pch=13,
new_page=TRUE,
hrzl_lines = list("2" = gpar(col="#444444"),
"4" = gpar(col="#444444"),
"6" = gpar(col="#444444"),
"8" = gpar(col="#444444"),
"10" = gpar(col="#444444")),
colgap = unit(5, "mm"),
lineheight = unit(0.6, "cm"),
line.margin = unit(0.2, "cm"),
graphwidth = unit(10, "cm"),
legend=c("difference-in-differences (DID)","difference-of-endlines (DOE)"),
legend_args = fpLegend(pos = list(x=0.0, y=-0.25))
)

#Elimination of breeding places - Pupae Per Person Index

#Generation of matrices including study group, n, BI baseline, BI endline
#and the coefficients and intervals of difference-in-differences and difference-of-endlines.

PPIELdiffdiffwithout <-
structure(
c(1, 0, 1, 0, 1, 0, 1, 0, NA,
2000, 2000, 441, 448, 500, 500, 8422, 10748, NA,
0.048, 0.016, 0.44, 0.42, 0.11, 0.21, 0.44, 0.29, NA,
0.13, 0.14, 0.04, 0.4, 0.37, 0.11, 0.36, 1.4, NA,
-0.042, NA, -0.38, NA, 0.36, NA, -1.19, NA, -0.952,
-0.042, NA, -0.38, NA, 0.36, NA, -1.19, NA, -0.952,
-0.042, NA, -0.38, NA, 0.36, NA, -1.19, NA, -0.952),
.Dim = c(9L, 7L),
.Dimnames = list(c("Basso", "2015",
"Kittayapong", "2012",
"Tun-Lin (Peru)", "2009",
"Vanlerberghe", "2009",

```

```

        "Pooled"),
        c("group", "n", "PPI (b)", "PPI (e)", "coef", "lower", "upper"))
    )
PPIELdiffendlwithout <-
  structure(
    c(1, 0, 1, 0, 1, 0, 1, 0, NA,
      2000, 2000, 441, 448, 500, 500, 8422, 10748, NA,
      0.048, 0.016, 0.44, 0.42, 0.11, 0.21, 0.44, 0.29, NA,
      0.13, 0.14, 0.04, 0.4, 0.37, 0.11, 0.36, 1.4, NA,
      -0.01, NA, -0.36, NA, 0.26, NA, -1.04, NA, -0.832,
      -0.01, NA, -0.36, NA, 0.26, NA, -1.04, NA, -0.832,
      -0.01, NA, -0.36, NA, 0.26, NA, -1.04, NA, -0.832),
      .Dim = c(9L, 7L),
      .Dimnames = list(c("Basso", "2015",
        "Kittayapong", "2012",
        "Tun-Lin (Peru)", "2009",
        "Vanlerberghe", "2009",
        "Pooled"),
        c("group", "n", "PPI (b)", "PPI (e)", "coef", "lower", "upper"))
    )

```

***#Introduction of a header for the columns***

```

PPIELdiffdiffheader <- rbind(rep(NA,times=ncol(PPIELdiffdiffwithout)),
                             PPIELdiffdiffwithout)
rownames(PPIELdiffdiffheader)[1] <- "Author"
PPIELdiffendlheader <- rbind(rep(NA,times=ncol(PPIELdiffendlwithout)),
                              PPIELdiffendlwithout)
rownames(PPIELdiffendlheader)[1] <- "Author"

```

***#Generation of a label matrix including group, n, BI baseline, BI endline, #difference-in-differences and difference-of-endlines.***

```

lab_mtrx_ELPPPI <- cbind(rownames(PPIELdiffdiffheader),
                        append("group",
                              round(PPIELdiffdiffheader[, "group"], 0)[2:10]),
                        append("n",
                              round(PPIELdiffdiffheader[, "n"], 0)[2:10]),
                        append("PPI (b)",
                              round(PPIELdiffdiffheader[, "PPI (b)"], 2)[2:10]),
                        append("PPI (e)",
                              round(PPIELdiffdiffheader[, "PPI (e)"], 2)[2:10]),
                        append("DID",
                              round(PPIELdiffdiffheader[, "coef"], 2)[2:10]),
                        append("DOE",
                              round(PPIELdiffendlheader[, "coef"], 2)[2:10]))

```

***#Generation of an excel table which was manually processed and red in R again***

```

write.xlsx(lab_mtrx_ELPPPI, "C:/Users/Claudia/Desktop/R_Plot/lab_mtrx_ELPPPI.xlsx")
lab_mtrx_ELPPPI <- read_excel("C:/Users/Claudia/Desktop/R_Plot/lab_mtrx_ELPPPIv2.xlsx")

```

***#Generation of the forest plot with label matrix***

```

forestplot2(mean=cbind(PPIELdiffdiffheader[, "coef"], PPIELdiffendlheader[, "coef"]),
            lower=cbind(PPIELdiffdiffheader[, "lower"], PPIELdiffendlheader[, "lower"]),
            upper=cbind(PPIELdiffdiffheader[, "upper"], PPIELdiffendlheader[, "upper"]),
            labeltext=lab_mtrx_ELPPPI,
            txt_gp = fpTxtGp(label = gpar(cex = 0.7),
                              legend = gpar(cex = 0.7),
                              ticks = gpar(cex = 0.7)),
            is.summary=c(TRUE, rep(FALSE, times=nrow(PPIELdiffdiffheader)-1)),
            clip=c(-1.5, 0.5),
            xticks=c(-1.5, -1, -0.5, 0, 0.5),
            boxsize=
              c(0.0,
                0.27,
                0,
                0.22,
                0,
                0.22,
                0,
                0.68,
                0,
                1),
            col=fpColors(box=c("darkred", "darkblue")),
            fn.ci_norm=

```



```

list(fpDrawNormalCI,
     fpDrawNormalCI,
     fpDrawDiamondCI),
pch=13,
new_page=TRUE,
hrzl_lines = list("2" = gpar(col="#444444"),
                  "4" = gpar(col="#444444"),
                  "6" = gpar(col="#444444"),
                  "8" = gpar(col="#444444"),
                  "10" = gpar(col="#444444")),
colgap = unit(5, "mm"),
lineheight = unit(0.6, "cm"),
line.margin = unit(0.2, "cm"),
graphwidth = unit(10, "cm"),
legend=c("difference-in-differences (DID)", "difference-of-endlines (DOE)"),
legend_args = fpLegend(pos = list(x=0.0, y=-0.25))
)

```

### **#Pooled estimates - Breteau Index**

```

BI_pooled_overview_DID <-
structure(
  c(-7.897530338, -3.616872038, -8.834022567, -0.448497092, -0.52697862,
    -7.897530338, -3.616872038, -8.834022567, -0.448497092, -0.52697862,
    -7.897530338, -3.616872038, -8.834022567, -0.448497092, -0.52697862),
  .Dim = c(5L, 3L),
  .Dimnames = list(c("container covers without insecticides",
                    "container covers with insecticides",
                    "waste management with direct garbage collection",
                    "waste management without direct garbage collection",
                    "elimination of breeding places"),
                  c("coef", "lower", "upper"))
)

```

```

BI_pooled_overview_DOE <-
structure(
  c(-5.039377642, 0.636872038, -6.179179695, -5.378552679, -0.015632508,
    -5.039377642, 0.636872038, -6.179179695, -5.378552679, -0.015632508,
    -5.039377642, 0.636872038, -6.179179695, -5.378552679, -0.015632508),
  .Dim = c(5L, 3L),
  .Dimnames = list(c("container covers without insecticides",
                    "container covers with insecticides",
                    "waste management with direct garbage collection",
                    "waste management without direct garbage collection",
                    "elimination of breeding places"),
                  c("coef", "lower", "upper"))
)

```

### **#Introduction of a header for the columns**

```

BI_pooled_DID_header <- rbind(rep(NA, times=ncol(BI_pooled_overview_DID)),
                             BI_pooled_overview_DID)
BI_pooled_DOE_header <- rbind(rep(NA, times=ncol(BI_pooled_overview_DOE)),
                              BI_pooled_overview_DOE)

```

### **#Generation of a label matrix including group, n, BI baseline, BI endline, #difference-in-differences and difference-of-endlines.**

```

lab_mtrx_pooledBI <- cbind(rownames(BI_pooled_DID_header),
                          append("DID",
                                  round(BI_pooled_DID_header[, "coef"], 1)[2:6]),
                          append("DOE",
                                  round(BI_pooled_DOE_header[, "coef"], 1)[2:6]))

```

### **#Generation of the forest plot with label matrix**

```

forestplot2(mean=cbind(BI_pooled_DID_header[, "coef"], BI_pooled_DOE_header[, "coef"]),
            lower=cbind(BI_pooled_DID_header[, "lower"], BI_pooled_DOE_header[, "lower"]),
            upper=cbind(BI_pooled_DID_header[, "upper"], BI_pooled_DOE_header[, "upper"]),
            labeltext=lab_mtrx_pooledBI,
            txt_gp = fpTxtGp(label = gpar(cex = 0.7)),

```

```

        legend = gpar(cex = 0.7),
        ticks = gpar(cex = 0.7)),
is.summary=c(TRUE, rep(FALSE, times=nrow(BI_pooled_DID_header)-1)),
clip=c(-10, 2),
xticks=c(-10, -8, -6, -4, -2, 0, 2),
boxsize=
  c(0.9,
    0.9,
    0.9,
    0.9,
    0.9,
    0.9),
col=fpColors(box=c("darkred", "darkblue")),
fn.ci_norm=
  list(fpDrawDiamondCI,
       fpDrawDiamondCI,
       fpDrawDiamondCI,
       fpDrawDiamondCI,
       fpDrawDiamondCI,
       fpDrawDiamondCI),
pch=13,
new_page=TRUE,
hrzl_lines = list("2" = gpar(col="#444444"),
                  "3" = gpar(col="#444444"),
                  "4" = gpar(col="#444444"),
                  "5" = gpar(col="#444444"),
                  "6" = gpar(col="#444444")),
colgap = unit(5, "mm"),
lineheight = unit(0.8, "cm"),
line.margin = unit(0.4, "cm"),
graphwidth = unit(10, "cm"),
legend=c("difference-in-differences (DID)", "difference-of-endlines (DOE)"),
legend_args = fpLegend(pos = list(x=0.0, y=-0.3))
)

```

#### **#Pooled estimates - Pupae Per Person Index**

```

PPI_pooled_overview_DID <-
  structure(
    c(-0.18318713, -0.83268121, -0.240814531, -0.563559196, -0.952496779,
      -0.18318713, -0.83268121, -0.240814531, -0.563559196, -0.952496779,
      -0.18318713, -0.83268121, -0.240814531, -0.563559196, -0.952496779),
    .Dim = c(5L, 3L),
    .Dimnames = list(c("container covers without insecticides",
                       "container covers with insecticides",
                       "waste management with direct garbage collection",
                       "waste management without direct garbage collection",
                       "elimination of breeding places"),
                     c("coef", "lower", "upper"))
  )

```

```

PPI_pooled_overview_DOE <-
  structure(
    c(-0.100234232, 0.088522167, -0.137064531, -0.545940259, -0.832405337,
      -0.100234232, 0.088522167, -0.137064531, -0.545940259, -0.832405337,
      -0.100234232, 0.088522167, -0.137064531, -0.545940259, -0.832405337),
    .Dim = c(5L, 3L),
    .Dimnames = list(c("container covers without insecticides",
                       "container covers with insecticides",
                       "waste management with direct garbage collection",
                       "waste management without direct garbage collection",
                       "elimination of breeding places"),
                     c("coef", "lower", "upper"))
  )

```

#### **#Introduction of a header for the columns**

```

PPI_pooled_DID_header <- rbind(rep(NA, times=ncol(PPI_pooled_overview_DID)),
                              PPI_pooled_overview_DID)
PPI_pooled_DOE_header <- rbind(rep(NA, times=ncol(PPI_pooled_overview_DOE)),
                               PPI_pooled_overview_DOE)

```

#### **#Generation of a label matrix including group, n, BI baseline, BI endline, #difference-in-differences and difference-of-endlines.**

```

lab_mtx_pooledPPI <- cbind(rownames(PPI_pooled_DID_header),
                           append("DID",
                                   round(PPI_pooled_DID_header[, "coef"], 2) [2:6]),

```

```
append("DOE",
       round(PPI_pooled_DOE_header[, "coef"], 2) [2:6]))
```

**#Generation of the forest plot with label matrix**

```
forestplot2(mean=cbind(PPI_pooled_DID_header[, "coef"], PPI_pooled_DOE_header[, "coef"]),
            lower=cbind(PPI_pooled_DID_header[, "lower"], PPI_pooled_DOE_header[, "lower"]),
            upper=cbind(PPI_pooled_DID_header[, "upper"], PPI_pooled_DOE_header[, "upper"]),
            labeltext=lab_mtrx_pooledPPI,
            txt_gp = fpTxtGp(label = gpar(cex = 0.7),
                              legend = gpar(cex = 0.7),
                              ticks = gpar(cex = 0.7)),
            is.summary=c(TRUE, rep(FALSE, times=nrow(PPI_pooled_DID_header)-1)),
            clip=c(-1, 0.2),
            xticks=c(-1, -0.8, -0.6, -0.4, -0.2, 0, 0.2),
            boxsize=
              c(0.9,
                0.9,
                0.9,
                0.9,
                0.9,
                0.9),
            col=fpColors(box=c("darkred", "darkblue")),
            fn.ci_norm=
              list(fpDrawDiamondCI,
                  fpDrawDiamondCI,
                  fpDrawDiamondCI,
                  fpDrawDiamondCI,
                  fpDrawDiamondCI,
                  fpDrawDiamondCI),
            pch=13,
            new_page=TRUE,
            hrzl_lines = list("2" = gpar(col="#444444"),
                              "3" = gpar(col="#444444"),
                              "4" = gpar(col="#444444"),
                              "5" = gpar(col="#444444"),
                              "6" = gpar(col="#444444")),
            colgap = unit(5, "mm"),
            lineheight = unit(0.8, "cm"),
            line.margin = unit(0.4, "cm"),
            graphwidth = unit(10, "cm"),
            legend=c("difference-in-differences (DID)", "difference-of-endlines (DOE)"),
            legend_args = fpLegend(pos = list(x=0.0, y=-0.3))
)
```
