# Supplementary material for: Environmental methods for dengue vector control – A systematic review and meta-analysis
Source: PubMed Central journal article supplement (PMC6650086; doi:10.1371/journal.pntd.0007420), 2019-07-11
Supplement: pntd.0007420.s003.pdf [file pntd.0007420.s003.pdf]

### S3 Appendix. Quality assessment

| Section/Topic                    | Item       | Overgaard 2016 |      | Andersson 2015 |      | Basso 2015 |      | Caprara 2015 |      | Mitchell-Foster 2015 |      |
|----------------------------------|------------|----------------|------|----------------|------|------------|------|--------------|------|----------------------|------|
| <b>Title and abstract</b>        |            |                |      |                |      |            |      |              |      |                      |      |
|                                  | <b>1a</b>  | yes            |      | yes            |      | no         |      | yes          |      | no                   |      |
|                                  | <b>1b</b>  | yes            | good | yes            | good | yes        | ok   | yes          | ok   | yes                  | good |
| <b>Introduction</b>              |            |                |      |                |      |            |      |              |      |                      |      |
| <b>Background</b>                | <b>2a</b>  | yes            | good | yes            | good | yes        | good | yes          | good | yes                  | good |
| <b>Objectives</b>                | <b>2b</b>  | yes            | good | yes            | good | yes        | good | yes          | good | yes                  | good |
| <b>Methods</b>                   |            |                |      |                |      |            |      |              |      |                      |      |
| <b>Trial design</b>              | <b>3a</b>  | yes            | good | yes            | good | yes        | good | yes          | good | yes                  | good |
|                                  | <b>3b</b>  | NR             |      | NR             |      | NR         |      | NR           |      | NR                   |      |
| <b>Participants</b>              | <b>4a</b>  | yes            | good | yes            | good | yes        | good | no           |      | yes                  | ok   |
|                                  | <b>4b</b>  | yes            | good | yes            | bad  | yes        | good | yes          | good | yes                  | good |
| <b>Interventions</b>             | <b>5</b>   | yes            | good | yes            | good | yes        | good | yes          | good | yes                  | good |
| <b>Outcomes</b>                  | <b>6a</b>  | yes            | good | yes            | good | yes        | bad  | no           |      | yes                  | good |
|                                  | <b>6b</b>  | NR             |      | NR             |      | NR         |      | NR           |      | NR                   |      |
| <b>Sample size</b>               | <b>7a</b>  | yes            | good | yes            | good | yes        | good | no           |      | yes                  | ok   |
|                                  | <b>7b</b>  | NR             |      | NR             |      | NR         |      | NR           |      | NR                   |      |
| <b>Randomisation</b>             |            |                |      |                |      |            |      |              |      |                      |      |
| <b>Sequence generation</b>       | <b>8a</b>  | yes            | good | yes            | good | no         |      | yes          | good | yes                  | good |
|                                  | <b>8b</b>  | yes            | good | no             |      | yes        | good | yes          | ok   | yes                  | good |
| <b>Allocation</b>                | <b>9</b>   | yes            | ok   | yes            | good | yes        | ok   | yes          | ok   | yes                  | good |
| <b>Implementation</b>            | <b>10</b>  | yes            | good | yes            | good | no         |      | yes          | bad  | yes                  | ok   |
| <b>Blinding</b>                  | <b>11a</b> | NR             |      | yes            | good | NR         |      | NR           |      | NR                   |      |
|                                  | <b>11b</b> | NR             |      | NR             |      | NR         |      | NR           |      | NR                   |      |
| <b>Statistical methods</b>       | <b>12a</b> | yes            | good | yes            | good | yes        | ok   | yes          | bad  | yes                  | good |
|                                  | <b>12b</b> | NR             |      | yes            | good | NR         |      | NR           |      | NR                   |      |
| <b>Results</b>                   |            |                |      |                |      |            |      |              |      |                      |      |
| <b>Participant flow</b>          | <b>13a</b> | yes            | good | yes            | good | yes        | bad  | no           |      | yes                  | bad  |
|                                  | <b>13b</b> | yes            | good | yes            | bad  | no         |      | no           |      | no                   |      |
| <b>Recruitment</b>               | <b>14a</b> | yes            | good | yes            | good | yes        | good | yes          | ok   | yes                  | good |
|                                  | <b>14b</b> | NR             |      | NR             |      | NR         |      | NR           |      | NR                   |      |
| <b>Baseline data</b>             | <b>15</b>  | yes            | good | yes            | ok   | no         |      | yes          | ok   | no                   |      |
| <b>Numbers analysed</b>          | <b>16</b>  | yes            | good | yes            | good | yes        | bad  | yes          | bad  | yes                  | bad  |
| <b>Outcomes &amp; estimation</b> | <b>17a</b> | yes            | good | yes            | good | yes        | ok   | yes          | bad  | yes                  | good |
|                                  | <b>17b</b> | NR             |      | yes            | good | yes        | good | no           |      | NR                   |      |
| <b>Ancillary analyses</b>        | <b>18</b>  | NR             |      | yes            | good | NR         |      | NR           |      | NR                   |      |
| <b>Harms</b>                     | <b>19</b>  | yes            | good | no             |      | no         |      | no           |      | no                   |      |
| <b>Discussion</b>                |            |                |      |                |      |            |      |              |      |                      |      |
| <b>Limitations</b>               | <b>20</b>  | yes            | good | yes            | good | yes        | good | yes          | ok   | yes                  | bad  |
| <b>Generalisability</b>          | <b>21</b>  | yes            | ok   | yes            | good | yes        | ok   | yes          | ok   | yes                  | ok   |
| <b>Interpretation</b>            | <b>22</b>  | yes            | good | yes            | ok   | yes        | good | yes          | ok   | yes                  | good |
| <b>Other information</b>         |            |                |      |                |      |            |      |              |      |                      |      |
| <b>Registration</b>              | <b>23</b>  | yes            |      | yes            |      | no         |      | no           |      | no                   |      |
| <b>Protocol</b>                  | <b>24</b>  | no             |      | no             |      | no         |      | no           |      | no                   |      |
| <b>Funding</b>                   | <b>25</b>  | yes            |      | yes            |      | yes        |      | yes          |      | yes                  |      |

S3 Appendix. Quality assessment of included studies using the CONSORT 2010 checklist as a framework. NR: Not Relevant. (11)

| Section/Topic                    | Item       | Quintero 2015 | Abeyewickreme 2012 | Arunachalam 2012 | Castro 2012 | Kittayapong 2012 |
|----------------------------------|------------|---------------|--------------------|------------------|-------------|------------------|
| <b>Title and abstract</b>        |            |               |                    |                  |             |                  |
|                                  | <b>1a</b>  | yes           | no                 | no               | yes         | no               |
|                                  | <b>1b</b>  | yes           | good               | yes              | good        | yes              |
| <b>Introduction</b>              |            |               |                    |                  |             |                  |
| <b>Background</b>                | <b>2a</b>  | yes           | ok                 | yes              | good        | yes              |
| <b>Objectives</b>                | <b>2b</b>  | yes           | good               | yes              | ok          | yes              |
| <b>Methods</b>                   |            |               |                    |                  |             |                  |
| <b>Trial design</b>              | <b>3a</b>  | yes           | good               | yes              | good        | yes              |
|                                  | <b>3b</b>  | NR            |                    | NR               |             | NR               |
| <b>Participants</b>              | <b>4a</b>  | no            |                    | yes              | good        | yes              |
|                                  | <b>4b</b>  | yes           | good               | yes              | ok          | yes              |
| <b>Interventions</b>             | <b>5</b>   | yes           | good               | yes              | good        | yes              |
| <b>Outcomes</b>                  | <b>6a</b>  | yes           | good               | yes              | bad         | yes              |
|                                  | <b>6b</b>  | NR            |                    | NR               |             | NR               |
| <b>Sample size</b>               | <b>7a</b>  | yes           | good               | yes              | ok          | yes              |
|                                  | <b>7b</b>  | yes           | good               | NR               |             | NR               |
| <b>Randomisation</b>             |            |               |                    |                  |             |                  |
| <b>Sequence generation</b>       | <b>8a</b>  | yes           | good               | yes              | good        | yes              |
|                                  | <b>8b</b>  | yes           | good               | yes              | good        | yes              |
| <b>Allocation</b>                | <b>9</b>   | yes           | good               | yes              | good        | yes              |
| <b>Implementation</b>            | <b>10</b>  | yes           | bad                | no               |             | yes              |
| <b>Blinding</b>                  | <b>11a</b> | NR            |                    | NR               |             | NR               |
|                                  | <b>11b</b> | NR            |                    | NR               |             | NR               |
| <b>Statistical methods</b>       | <b>12a</b> | yes           | good               | yes              | ok          | yes              |
|                                  | <b>12b</b> | NR            |                    | NR               |             | NR               |
| <b>Results</b>                   |            |               |                    |                  |             |                  |
| <b>Participant flow</b>          | <b>13a</b> | yes           | good               | yes              | bad         | no               |
|                                  | <b>13b</b> | yes           | good               | no               |             | no               |
| <b>Recruitment</b>               | <b>14a</b> | yes           | good               | yes              | good        | yes              |
|                                  | <b>14b</b> | NR            |                    | NR               |             | NR               |
| <b>Baseline data</b>             | <b>15</b>  | no            |                    | yes              | good        | no               |
| <b>Numbers analysed</b>          | <b>16</b>  | yes           | good               | yes              | bad         | yes              |
| <b>Outcomes &amp; estimation</b> | <b>17a</b> | yes           | good               | yes              | good        | yes              |
|                                  | <b>17b</b> | yes           | good               | yes              | good        | yes              |
| <b>Ancillary analyses</b>        | <b>18</b>  | NR            |                    | yes              | ok          | NR               |
| <b>Harms</b>                     | <b>19</b>  | no            |                    | no               |             | no               |
| <b>Discussion</b>                |            |               |                    |                  |             |                  |
| <b>Limitations</b>               | <b>20</b>  | yes           | good               | yes              | bad         | no               |
| <b>Generalisability</b>          | <b>21</b>  | yes           | good               | yes              | good        | no               |
| <b>Interpretation</b>            | <b>22</b>  | yes           | good               | yes              | good        | yes              |
| <b>Other information</b>         |            |               |                    |                  |             |                  |
| <b>Registration</b>              | <b>23</b>  | no            |                    | no               |             | no               |
| <b>Protocol</b>                  | <b>24</b>  | no            |                    | no               |             | no               |
| <b>Funding</b>                   | <b>25</b>  | yes           |                    | no               |             | yes              |

**S3 Appendix. Quality assessment of included studies using the CONSORT 2010 checklist as a framework. NR: Not Relevant. Continued.**

| Section/Topic                    | Item       | Rizzo 2012 | Tana 2012 | Wai 2012 | Kusumawathie 2009 | Tun-Lin 2009 |
|----------------------------------|------------|------------|-----------|----------|-------------------|--------------|
| <b>Title and abstract</b>        |            |            |           |          |                   |              |
|                                  | <b>1a</b>  | no         | no        | no       | no                | yes          |
|                                  | <b>1b</b>  | yes        | good      | yes      | ok                | yes          |
| <b>Introduction</b>              |            |            |           |          |                   |              |
| <b>Background</b>                | <b>2a</b>  | yes        | ok        | yes      | ok                | yes          |
| <b>Objectives</b>                | <b>2b</b>  | yes        | good      | yes      | good              | yes          |
| <b>Methods</b>                   |            |            |           |          |                   |              |
| <b>Trial design</b>              | <b>3a</b>  | yes        | good      | yes      | good              | yes          |
|                                  | <b>3b</b>  | NR         | NR        | NR       | NR                | NR           |
| <b>Participants</b>              | <b>4a</b>  | yes        | ok        | yes      | ok                | no           |
|                                  | <b>4b</b>  | yes        | good      | yes      | good              | yes          |
| <b>Interventions</b>             | <b>5</b>   | yes        | good      | yes      | good              | yes          |
| <b>Outcomes</b>                  | <b>6a</b>  | yes        | good      | yes      | ok                | yes          |
|                                  | <b>6b</b>  | NR         | NR        | NR       | NR                | NR           |
| <b>Sample size</b>               | <b>7a</b>  | yes        | good      | no       | yes               | ok           |
|                                  | <b>7b</b>  | NR         | NR        | NR       | NR                | NR           |
| <b>Randomisation</b>             |            |            |           |          |                   |              |
| <b>Sequence generation</b>       | <b>8a</b>  | yes        | good      | yes      | good              | no           |
|                                  | <b>8b</b>  | yes        | good      | yes      | good              | yes          |
| <b>Allocation</b>                | <b>9</b>   | yes        | good      | yes      | good              | no           |
| <b>Implementation</b>            | <b>10</b>  | no         | no        | no       | no                | yes          |
| <b>Blinding</b>                  | <b>11a</b> | NR         | NR        | NR       | NR                | NR           |
|                                  | <b>11b</b> | NR         | NR        | NR       | NR                | NR           |
| <b>Statistical methods</b>       | <b>12a</b> | yes        | ok        | yes      | ok                | no           |
|                                  | <b>12b</b> | NR         | NR        | NR       | NR                | NR           |
| <b>Results</b>                   |            |            |           |          |                   |              |
| <b>Participant flow</b>          | <b>13a</b> | yes        | bad       | no       | no                | yes          |
|                                  | <b>13b</b> | yes        | ok        | no       | no                | no           |
| <b>Recruitment</b>               | <b>14a</b> | yes        | good      | yes      | good              | yes          |
|                                  | <b>14b</b> | NR         | NR        | NR       | NR                | NR           |
| <b>Baseline data</b>             | <b>15</b>  | yes        | bad       | no       | yes               | bad          |
| <b>Numbers analysed</b>          | <b>16</b>  | yes        | ok        | yes      | bad               | yes          |
| <b>Outcomes &amp; estimation</b> | <b>17a</b> | yes        | ok        | yes      | bad               | yes          |
|                                  | <b>17b</b> | NR         | NR        | no       | yes               | good         |
| <b>Ancillary analyses</b>        | <b>18</b>  | NR         | NR        | NR       | NR                | NR           |
| <b>Harms</b>                     | <b>19</b>  | no         | no        | no       | no                | no           |
| <b>Discussion</b>                |            |            |           |          |                   |              |
| <b>Limitations</b>               | <b>20</b>  | yes        | good      | no       | yes               | bad          |
| <b>Generalisability</b>          | <b>21</b>  | yes        | bad       | no       | yes               | bad          |
| <b>Interpretation</b>            | <b>22</b>  | yes        | good      | yes      | bad               | yes          |
| <b>Other information</b>         |            |            |           |          |                   |              |
| <b>Registration</b>              | <b>23</b>  | no         | no        | no       | no                | no           |
| <b>Protocol</b>                  | <b>24</b>  | no         | no        | no       | no                | no           |
| <b>Funding</b>                   | <b>25</b>  | yes        | yes       | yes      | yes               | yes          |

**S3 Appendix. Quality assessment of included studies using the CONSORT 2010 checklist as a framework. NR: Not Relevant. Continued.**

| Section/Topic                    | Item       | Vanlerberghe 2009 | Toledo 2007 | Kroeger 2006 | Leontsini 1993 |
|----------------------------------|------------|-------------------|-------------|--------------|----------------|
| <b>Title and abstract</b>        |            |                   |             |              |                |
|                                  | <b>1a</b>  | yes               | no          | yes          | no             |
|                                  | <b>1b</b>  | yes               | good        | yes          | bad            |
| <b>Introduction</b>              |            |                   |             |              |                |
| <b>Background</b>                | <b>2a</b>  | yes               | good        | yes          | good           |
| <b>Objectives</b>                | <b>2b</b>  | yes               | good        | yes          | ok             |
| <b>Methods</b>                   |            |                   |             |              |                |
| <b>Trial design</b>              | <b>3a</b>  | yes               | good        | yes          | good           |
|                                  | <b>3b</b>  | NR                | NR          | NR           | NR             |
| <b>Participants</b>              | <b>4a</b>  | yes               | bad         | yes          | ok             |
|                                  | <b>4b</b>  | yes               | good        | yes          | good           |
| <b>Interventions</b>             | <b>5</b>   | yes               | good        | yes          | good           |
| <b>Outcomes</b>                  | <b>6a</b>  | yes               | good        | yes          | bad            |
|                                  | <b>6b</b>  | NR                | NR          | NR           | NR             |
| <b>Sample size</b>               | <b>7a</b>  | yes               | ok          | no           | yes            |
|                                  | <b>7b</b>  | NR                | NR          | NR           | NR             |
| <b>Randomisation</b>             |            |                   |             |              |                |
| <b>Sequence generation</b>       | <b>8a</b>  | yes               | good        | no           | yes            |
|                                  | <b>8b</b>  | yes               | ok          | yes          | ok             |
| <b>Allocation</b>                | <b>9</b>   | yes               | ok          | yes          | ok             |
| <b>Implementation</b>            | <b>10</b>  | no                | no          | no           | yes            |
| <b>Blinding</b>                  | <b>11a</b> | NR                | NR          | NR           | NR             |
|                                  | <b>11b</b> | NR                | NR          | NR           | NR             |
| <b>Statistical methods</b>       | <b>12a</b> | yes               | good        | yes          | good           |
|                                  | <b>12b</b> | NR                | NR          | NR           | NR             |
| <b>Results</b>                   |            |                   |             |              |                |
| <b>Participant flow</b>          | <b>13a</b> | yes               | ok          | no           | yes            |
|                                  | <b>13b</b> | yes               | ok          | no           | yes            |
| <b>Recruitment</b>               | <b>14a</b> | yes               | good        | yes          | good           |
|                                  | <b>14b</b> | NR                | NR          | NR           | NR             |
| <b>Baseline data</b>             | <b>15</b>  | yes               | ok          | no           | no             |
| <b>Numbers analysed</b>          | <b>16</b>  | yes               | ok          | yes          | bad            |
| <b>Outcomes &amp; estimation</b> | <b>17a</b> | yes               | good        | yes          | good           |
|                                  | <b>17b</b> | yes               | good        | yes          | good           |
| <b>Ancillary analyses</b>        | <b>18</b>  | NR                | NR          | NR           | NR             |
| <b>Harms</b>                     | <b>19</b>  | no                | no          | no           | no             |
| <b>Discussion</b>                |            |                   |             |              |                |
| <b>Limitations</b>               | <b>20</b>  | yes               | ok          | yes          | good           |
| <b>Generalisability</b>          | <b>21</b>  | yes               | ok          | yes          | ok             |
| <b>Interpretation</b>            | <b>22</b>  | yes               | good        | yes          | good           |
| <b>Other information</b>         |            |                   |             |              |                |
| <b>Registration</b>              | <b>23</b>  | yes               | no          | no           | no             |
| <b>Protocol</b>                  | <b>24</b>  | no                | no          | no           | no             |
| <b>Funding</b>                   | <b>25</b>  | yes               | yes         | yes          | yes            |

**S3 Appendix. Quality assessment of included studies using the CONSORT 2010 checklist as a framework. NR: Not Relevant. Continued.**
