# Supplementary material for: Environmental methods for dengue vector control – A systematic review and meta-analysis
Source: PubMed Central journal article supplement (PMC6650086; doi:10.1371/journal.pntd.0007420), 2019-07-11
Supplement: pntd.0007420.s006.pdf [file pntd.0007420.s006.pdf]

## **S6 Appendix. Formulas for difference-in-differences and difference-of-endlines calculation**

The effect measures difference-in-difference (DID) and difference-of-endlines (DOE) were calculated for BI and PPI in each study using measures at baseline (b) and endline (e) separated by intervention (I) and control (C) group according to the following formulas.

$$BI_{DID} = (BI_{ei} - BI_{bi}) - (BI_{ec} - BI_{bc})$$

$$PPI_{DID} = (PPI_{ei} - PPI_{bi}) - (PPI_{ec} - PPI_{bc})$$

$$BI_{DOE} = BI_{ei} - BI_{ec}$$

$$PPI_{DOE} = PPI_{ei} - PPI_{ec}$$
